# Supplementary material for: Potential and limits of vegetation indices compared to evaporite mineral indices for soil salinity discrimination and mapping
Source: Copernicus journal article supplement (doi:10.5194/soil-2021-55), 2021-08-24
Supplement: Supplementary file [file soil-2021-55-AC3-supplement.pdf]

This publication addresses a global environmental issue that affects a large portion of soils around the world. Salinity as a natural and anthropic phenomenon has been widely studied by geologists and in particular by geochemists, but the evaluation of its extent and the monitoring of its dynamics have not known the same scientific interest.

Another contribution of this article is the understanding of the dynamics of salts in soils; its strong contribution is the proposal and validation of a method of mapping and monitoring soil salinity based on new indices other than those usually known. I think that the choice of two saline environments with different geochemical dynamics was an excellent idea to test the limits of the proposed method.

**Dear reviewer thank you for time and your positive words.**

Professor A. Bannari

<https://www.researchgate.net/profile/Bannari-Abdou>

<https://scholar.google.fr/citations?user=D6sZhSQAAAAJ&hl=fr>
