# Supplementary material for: Potential and limits of vegetation indices compared to evaporite mineral indices for soil salinity discrimination and mapping
Source: Copernicus journal article supplement (doi:10.5194/soil-2021-55), 2021-08-24

OLI - SSSI

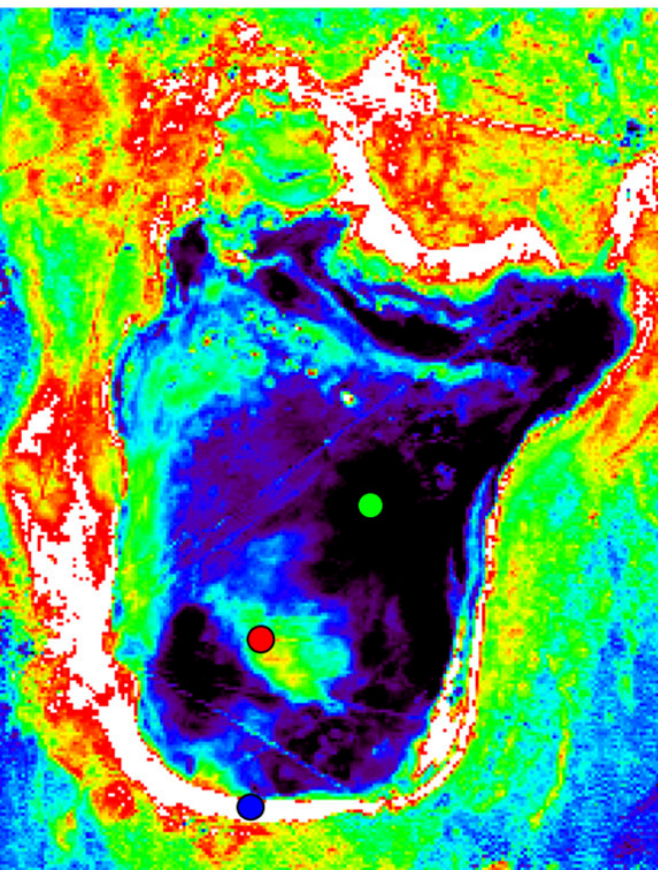

OLI - RGB

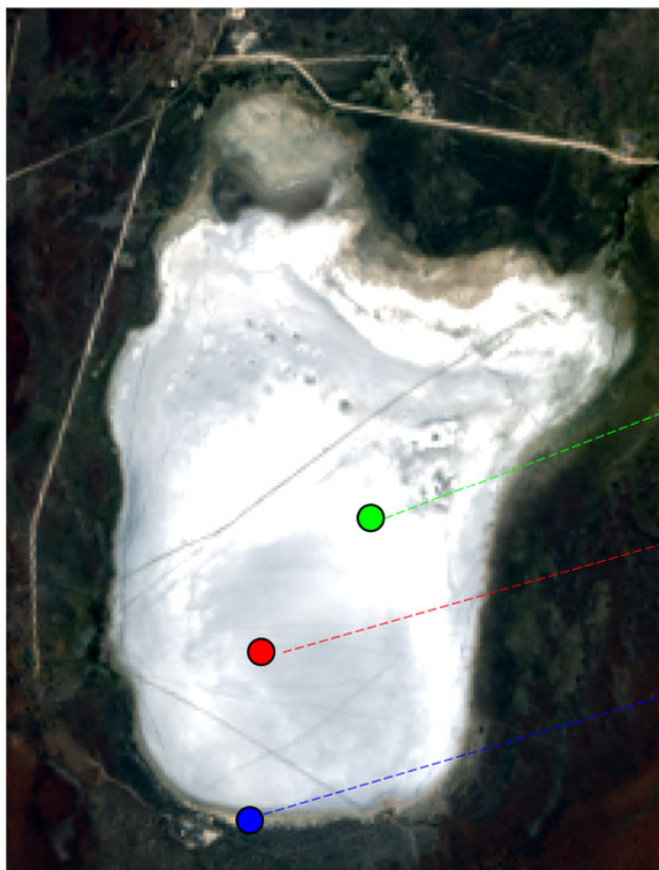

OLI - spectra

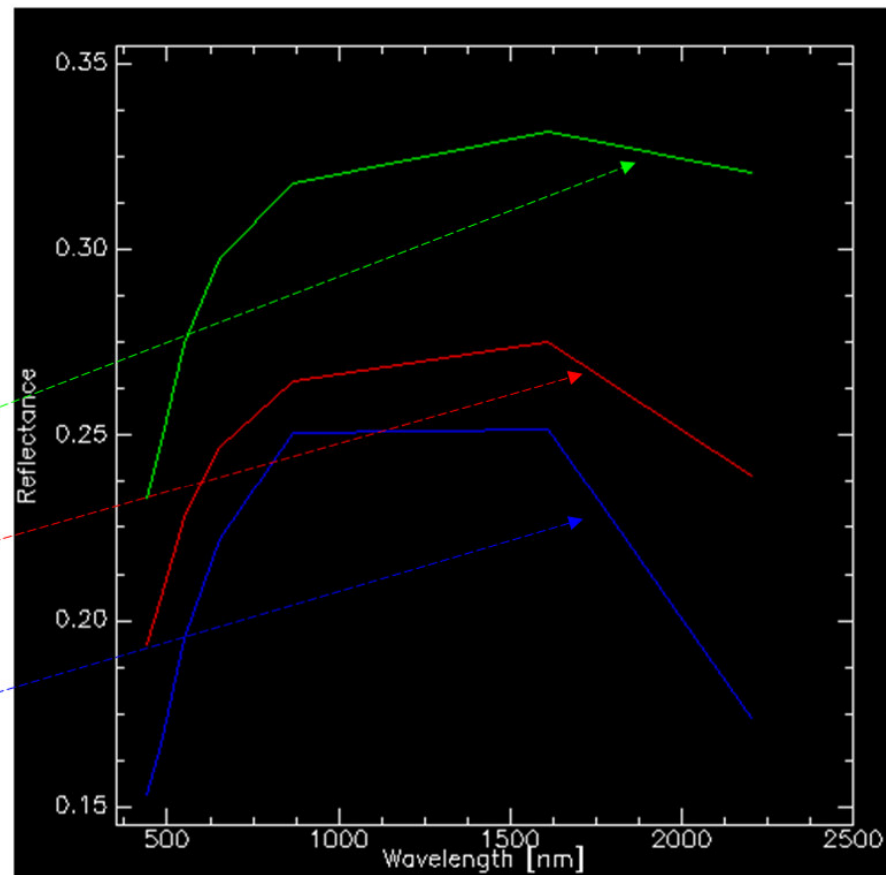

Supplement: Supplementary file [file soil-2021-55-RC1-supplement.pdf]
